# Supplementary material for: TFEB/Mitf links impaired nuclear import to autophagolysosomal dysfunction in C9-ALS
Source: eLife. 2020 Dec 10;9:e59419. doi: 10.7554/eLife.59419 (PMC7758070; doi:10.7554/eLife.59419)
Supplement: Source data 1. [file elife-59419-data1.xlsx]

## Sheet: Figure 1- Source Data
Fig 1B								Fig 1E
GMR-Gal4	attp2	ref2P RNAi #1	ref2p OE	attp2 / 30R	ref2P RNAi #1 / 30R	ref2P OE / 30R		Genotype	Alive	Dead	Total	% Alive	% Dead
Eye Degernation Score (see methods)	0	0	0	7	1	15		vGlut/attp2	164	25	189	86.7725	13.2275
Adult flies, 15 days, sum of both eyes	0	0	0	4	1	13		vGlut>30R/attp2	19	186	205	9.26829	90.7317
	0	0	0	8	2	14		vGlut>30R; ref2P RNAi 1	74	82	156	47.4359	52.5641
	0	0	0	4	0	13		vGlut>30R; ref2p RNAi 2	68	102	170	40	60
	0	0	0	5	3	14
	0	0	0	7	2	13
	0	0	0	9	13	15
	0	0	0	5	4	18
	0	0	0	5	0	17
	0	0	1	14	1	11		Fig 1F
	0	0	0	11	5	16		Genotype
	0	0	0	10	0	15		vGlut>LDS-44R x	Alive	Dead	Total	% Alive	% Dead
	0	0	0	12	9	8		luc RNAi	22	62	84	26.1905	73.8095
	0	0	0	15	5	13		ref2p RNAi 1	46	14	60	76.6667	23.3333
	0	0	0	13	1	12		ref2pHA	5	109	114	4.38596	95.614
				10
				8
				8
				8				Fig 1G	each cell represents the average number of "successes" of 10 trials of 10 flies
								Genotype (elavGS-Gal4)	Uninduced ( 30R; luc RNAi RU-)	ref2P RNAi #1 alone	30R; luc RNAi	30R; ref2P RNAi #1
Fig 1D								Climbing Performance	0.26	0.42	0.22	0.34
GMR-Gal4	36R*LucRNAi	36R*P62 RNAi 1	36R*P62 RNAi 2	36R*P62 OE					0.37	0.38	0.25	0.37
Eye Degneration Score (see methods)	8	3	1	8					0.63	0.42	0.2	0.41
Adult flies, 15 days, sum of both eyes	6	3	2	7					0.4	0.4	0.35	0.46
	10	6	1	8					0.52	0.4	0.23	0.36
	8	2	2	5					0.52	0.29	0.21	0.5
	8	6	2	6					0.4	0.44	0.14	0.36
	7	4	2	7					0.42	0.37	0.31	0.59
	6	1	2	7					0.42
	7	3	3	8
	9	5	2	12
	7	8	2	10
	8	6	2
	9	7	3
	10	6	3
	10	6	2
	8	8	3
	9	6	2
	8	5	2
	6	5	3
	11	8	3
	7	6	1
	10	9	3
	7	5	2
	9	5	2
		2	3
		8	2
		5	2
		3	2
		4	2
		6
		2
		6
		6
		6
		6
		6
		8
		8
		4
		7
		8
		8
		3
		5
		5
		6
		6
		6
		8
		5
		3
		8
		5
		3
		8
		5
		6
		6
		7
		6
		6
		5
		2

## Sheet: Figure 2- Source Data
Fig 2B				Fig 2H
Genotype	OK371*UAS-p62:GFP	OK371; 30R*UAS-p62:GFP		Genotype	OK371*UAS-GFP:Lamp1	OK371; 30R*UAS-GFP:Lamp1
Number of p62:GFP puncta				GFP:Lamp+ area (um^2)	Per VNC
Per VNC	479	4614			118	145
	473	1800			112	210
	1589	1984			142	260
	140	3169			81	164
	662	1526				191
Fig 2E	OK371*UAS-Atg8:mcherry	OK371; 30R*UAS-Atg8:mcherry		Fig 2J
	169	76
Number of Atg8:mcherry+ autophagosomes	520	90		Cp1 full length/cleaved	Act/w1118	Act/30R
Per VNC	158	80			0.0759908	0.213906
	127	200			0.141853	0.245851
	181	151			0.118396	0.237211
	41	75			0.0873427	0.167544
	350	156			0.117515	0.519451
	353	140
	115	60
	166	81
	404	195
	250	162
	579	68
	228
	242
	199

## Sheet: Figure 3- Source Data
	Fig 3B	Day 1		Day 28		Day 54
	Avg # PRs per ommatidium	LacZ	30R	LacZ	30R	LacZ	30R
		6.66667	6.83333	5.8	6.33333	6.83333	2.33333
		6.33333	6.5	6.8	6	6.66667	2.83333
		6.66667	5.83333	6.28571	5.83333	6.5	1.33333
		6.5	6	6.71429	4.8	6.66667	2.14286
		6.5	6	5.2	6.5	6.5	2
		6.85714	6.5		5.83333	6.57143	2.33333
		6.85714	6.66667
		6.75	6.33333
	Fig 3D	Autophagosomes		Autolysosome		Lysosome		MLB		MVB
		LacZ normalized	30R normalized	LacZ normalized	30R normalized	LacZ normalized	30R normalized	LacZ normalized	30R normalized	LacZ normalized	30R normalized
	# of vesicles, normalized to LacZ average	0.3	1.5	0.9	2.25	1	1.09524	0.333333	7.33333	1.35	1.35
		1.5	1.2	0.9	3.6	1.04762	0.952381	1.33333	5.33333	0.45	0.45
		1.2	1.71429	1.2	3.08571	0.952381	0.544218	1.33333	6.47619	1.2	1.54286

## Sheet: Figure 4-Source Data
	Fig 4B	% nuclear mitf			Fig 4D	% nuclear mitf
	Genotype	vGlut/+	vGlut/30R		vGlut>CD8:GFP	UAS-Mitf	30R ; UAS-Mitf
	Avg of at least 3 cells per SG	56.9	30.4353		Avg of 10 cells / VNC	65.4279	55.2551
		55.3716	39.6873			64.0725	58.3344
		55.3928	35.7811			60.2441	54.5681
		51.2101	34.0106			62.5616	46.5447
		49.9275	39.1438				51.9999
	Fig 4E	Genotype	Fold change was calculated using the standard curve method relative actin
		daGS/+ RU+									daGS>30R RU+
	RNA target	Mitf	Vha16-1	Vha68-2	Vha55	Vha44	Vha100-2	Atg8	Atg9		Mitf	Vha16-1	Vha68-2	Vha55	Vha44	Vha100-2	Atg8	Atg9
		1.03193	0.820225	0.93	1	1.1236	0.989011	1.46875	0.879121		0.723911	0.483146	0.1	0.604938	0.629213	0.604396	0.59375	1.08791
		0.862237	0.820225	1.08	0.987654	1.21348	1.12088	0.791667	1.25275		1.00117	0.966292	0.76	0.395062	1.20225	0.659341	0.822917	0.989011
		0.708947	1.11236	1.25	1.03704	1.04494	0.78022	1.02083	0.67033		1.07059	1.03371	0.94	0.950617	1.06742	0.494505	1.10417	0.934066
		0.995191	1.05618	0.85	0.962963	0.876404	1.01099	0.96875	1.05495		1.17647	1.21348	0.54	1.09877	0.955056	1	1.0625	1.03297
		1.06855	1.10112	0.98	0.987654	0.842697	1.0989	0.916667	1.14286		1.37647		0.67	0.469136	0.932584	0.956044	1.0625
		1.17674	1.23596	0.69		0.865169		0.90625			1.24706		1.52	1.03704		0.868132	1.125
		0.959543	0.865169	1.07				0.854167					0.97				1.0625
		1.00796		1.16				1.03125					1				1.03125
		1.21205											0.89
													1.06
		daGS>Mitf RU+									daGS>30R;Mitf RU+
	RNA target	Mitf	Vha16-1	Vha68-2	Vha55	Vha44	Vha100-2	Atg8	Atg9		Mitf	Vha16-1	Vha68-2	Vha55	Vha44	Vha100-2	Atg8	Atg9
		2.64706	1.17647	2.12941	1.61176	1.84706	1.18824	1.27083	1.43956		1.18824	0.269663	0.67	1.18519	0.932584	0.956044	0.541667	0.945055
		1.17647	2.79773	2.61	1.16049	2.64045	1.69231	1.09375	1.6044		3.78824	0.483146	0.71	0.567901	1.2809	0.956044	0.604167	1.20879
		2.12941	3.55839	0.85	1.22222	1.8427	1.16484	1.46875	1.20879		1.87059	1.60674	0.41	0.703704	1.31461	0.802198	1	0.989011
		1.61176	1.65238	1.37	1.28395	1.73034	1.10989	1.21875	1.35165		1.78824	1.22472	1.54	1.32099	1.23596	1.12088	1.5	1.20879
		1.84706	1.53156	1.39	1.40741	1.41573	1.15385	1.03125	0.989011		1.35294	0.988764	0.47		1.38202	1.13187	1.19792
		1.18824	1.61601	1.28		1.21348	1.26374	1.04167			1.75294		0.91				1
			1.16854	0.91		1.23596							0.93				1
				1.29

## Sheet: Figure 5- Source Data
	Fig 5B
	vGlut>S-GFP	30R;luc RNAi	30R;emb RNAi
	% nuclear mitf	32.6171	66.9144
	each value is mean of 5 cells	57.144	63.2201
		60.0356	69.5124
		62.1186	68.3678
			64.7903
	Fig 5D				Fig 5F
		vGlut>GFP:Lamp1				vGlut>Atg8:mcherry
	Genotype	30R;luc RNAi	30R;emb RNAi		Number of Atg8:mcherry+ autophagosomes	30R ; luc RNAi	30R ; emb RNAi
	GFP:Lamp+ area (um^2)	42.4	52.2		Per VNC	6	68
	per VNC	123.1	24.7			14	48
		114.4	42.1			26	18
		34.2	15			32	79
		316.8	51.6			17	109
		126.2	0.03			37	38
						44	40
						14	32
						17	93
						21	61
	Fig 5H
	vGlut>p62:GFP	luc RNAi	emb RNAi	30R ; luc RNAi	30R ; emb RNAi
	p62-GFP+ Area (µm^2)	4.325	20.195	77.817	105.094
	per VNC	2.864	10.465	83.241	77.366
		5.542	3.825	66.587	104.309
		11.593	7.582	12.77	47.432
		3.452	1.55	20.371	16.193
		2.835	14.693	9.798	20.283
		1.824	0.422	28.1	46.687
		3.835	2.226	9.7	42.008
		7.278	2.756	28.188	14.143
		1.236	4.414	15.477	43.705
		3.423	10.102	11.319	19.606
		4.061	6.993	46.598	34.623
		1.01		27.021	24.412
		1.795

## Sheet: Figure 6- Source Data
	Fig 6B						Fig 6C	Genotype
	GMR-Gal4	w1118	30R ; Mitf Dp	luc RNAi	30R ; Mitf RNAi 1			vGlut-Gal4	Alive	Dead	Total	%Alive	%Dead
	Eye Degernation Score (see methods)	14	6	6	18			w1118	125	8	133	93.985	6.01504
	Adult flies, 15 days, sum of both eyes	6	6	7	18			w1118 ; 30R	3	136	139	2.15827	97.8417
		13	6	15	18			Mitf Dp ; 30R	21	63	84	25	75
		16	3	8	18
		16	1	12	18
		13	6	14	12		Fig 6D	each cell represents the average number of "successes" of 10 trials of 10 flies
		10	5	7	18		Genotype (elavGS-Gal4)	30R ; lacZ RU-	30R; lacZ RU+	30R; Mit Dp RU-	30R; Mitf Dp RU+
		13	0	6	14		Climbing Performance	0.58	0.29	0.4	0.5
		12	4	14	18		vial 2	0.5	0.25	0.45	0.51
		17	4	12	14		vial 3	0.52	0.21	0.4	0.43
		15	3	14			vial 4	0.43	0.13	0.37	0.41
		6	3	13			vial 5	0.58	0.26	0.48	0.48
		17	3	14			vial 6	0.41	0.15	0.43	0.58
		6	2	14			vial 7	0.63	0.38	0.42	0.5
		16	1				vial 8	0.44	0.34	0.38	0.49
		5	7				vial 9	0.36	0.26	0.38	0.55
		14	9				vial 10	0.41	0.27	0.44	0.45
		13	5				vial 11	0.39	0.28	0.47	0.36
		14	14				vial 12	0.55	0.3	0.41	0.56
		11	13				vial 13	0.61	0.33	0.32	0.46
							vial 14	0.48	0.32	0.3	0.47
							vial 15	0.34	0.31		0.5
							vial 16	0.36	0.27
							vial 17		0.27
	Fig 6F	vGlut>GFP:Lamp1				Fig 6H	vGlut>GFP:Lamp1
	Genotype	w1118	30R	Mitf Dp ; 30R		Genotype	w1118	30R	Mitf Dp ; 30R
	GFP:Lamp+ area (um^2)	7.336	43.548	11.662		p62:GFP+ area (um^2)	15.713	149.613	157.901
		5.1	45.245	2.54			24.354	140.903	153.31
		4.159	23.392	8.572			13.045	194.72	72.286
		5.532	109.674	16.86			13.153	161.392	69.382
		6.071	75.689	19.646				181.901	82.172
		27.07	62.664	36.467			10.965	154.909	42.381
		6.483	44.225	42.263			11.75	70.805	55.514
		10.053	24.304	13.329			2.58	186.128	40.164
		4.561	111.136	15.389			10.043		108.33
		12.025	72.864	19.979			4.306		74.414
		16.154	22.539	22.529			10.269	177.742	115.618
		15.006	41.567	7.562			4.678	118.884	108.35
		6.64	56.171	5.218			12.574	105.957	137.47
		18.498	51.757	17.517			7.994	81.79	55.994
		23.912	45.843	8.003			4.698		73.296

## Sheet: Figure 7- Source Data
		Fig 7B						Fig 7D
			Control		47R-VFH				Nuclear TFEB / Total Protein
			Normal	Starvation	Normal	Starvation			control	C9-ALS
			N/(N+C)	N/(N+C)	N/(N+C)	N/(N+C)			1.01853	0.345865
			41.9846	59.8165	47.4089	44.5277			1.01504	0.786725
			38.805	57.4738	51.1974	52.0439			1.70083	0.112314
			37.3758	58.2069	47.8326	48.2095			2.58425	0.322026
			41.9759	52.1324	48.7454	51.2652
			39.2695	58.7103	52.0296	52.3307			Cytoplasmic TFEB / Total Protein
			39.8866	55.6986	62.6739	53.2779			control	C9-ALS
			43.3578	56.6801	57.6419	52.5123			0.911155	0.472091
			43.0371	56.4329	54.0982	50.2676			1.46111	0.861095
			43.9787	51.1246	53.0012	50.0747			1.61539	0.483664
			41.8639	53.8413	49.7719	51.0285			0.629062	0.508054
			46.3598	54.748	54.4652	51.3608
			45.2761	49.6966	50.0587	47.9324
			47.1859	52.7646	46.1612	53.9979
			42.2375	56.0485	50.7162	49.4669
			42.3831	58.2558	44.6805	50.7834
			41.0418	58.796	46.1869	51.5597
			45.4844	48.571	46.7662	55.3025
			42.6592	57.2684	44.7885	53.7584
			43.2152	61.9446	46.9595	54.5227
			46.1807	49.42	47.5985	51.934
			47.6298	56.5185	49.0997	51.5087
			46.7333	55.9157	49.6044	53.1785
			43.9923	54.8019	46.9413	53.0159
			43.2199	55.8472	46.9235	47.9316
			45.9616	53.8203	46.7801	55.209
			45.6207	52.0158	44.1047	48.1226
			39.7186	54.7755	43.0517	47.752
			44.0321	55.3099	47.4485	46.6306
			35.8402	56.2782	46.4361	52.7039
			38.6609	55.4239	40.2515	52.2711
			41.5785	54.3808	48.7462	52.2263
			47.6241	54.6347	51.2024	47.3026
			42.4711	60.0528	46.6857	51.0125
			38.1892	55.5899	47.6157	52.3922
			38.4346	54.3542	44.3046	53.1674
			33.6878	49.3979		48.9973
			40.5081	52.6494		51.8705
			35.9248	49.5992		48.1242
			42.6247	52.8509
			35.3323	55.2613
			42.7665	51.7541
			42.1543	52.5484
			42.1883	56.8006
			34.339	65.4401
			40.223	55.5298
			41.0436	54.3827
			47.3733	55.3724

## Sheet: Figure S1- Source Data
	Fig S1B	Fold change measure by ddCt method				Fig S1C	Fold change measured by ddCt method; normalized to control
		Act-Gal4					GMR-Gal4
		Attp2	36111	33978			30R	30R ; p62 RNAi
		0.911158	0.229261	0.470261			1	1.06
		0.525283	0.250853	0.079368			1	0.95
		0.613224	0.107828	0.215152			1	1.41
		1.33799	0.3189	0.458091
		2.11851	0.080054

## Sheet: Figure S2- Source Data
		Fig S2A	Genotype	vGlut*UAS-p62:GFP	vGlut; 30R*UAS-p62:GFP			Fig S2C	Whole		Soluble		Pellet
			Volume of p62:GFP puncta, um^2					Act-Gal4	C	30R	C	30R	C	30R
			Avg of all puncta Per VNC	0.26	1.96			p62/Actin	0.93	7.36	2.2	7.78	1.29	7.96
				0.17	1.96				0.98	5.7	0.983	6.94	0.453	6.28
				0.42	2.36				0.81	7.12	1.23	7.12	0.91	7.38
				0.12	2.15
				0.22	2.67
								Fig S2F	Fold change measured by ddCt method; normalized to control
			Genotype	OK371*UAS-p62:GFP				Act-Gal4	w1118	30R
			Intensity of p62:GFP puncta, AU						1	1.34
				12.81	20.75				1	1.32
				12.45	22.19				1	1.02
				14.22	22.31				1	0.92
				12.42	20.79				1	0.69
				12.74	20.3
		Fig S2H						FigS2J
		Genotype	vGlut>p62:GFP					Genotype	vGlut>Atg8:mcherry
		area p62:GFP puncta	lacZ	3R	36R	GR36		number of puntca	LacZ	3R	36R	GR36
		um^2	19.724	8.18	70.658	21.49			230	242	115	54
			20.244	3.148	154.105	23.314			463	398	137	22
			38.114	10.093	39.174	43.823			438	423	181	84
			13.682	12.27	48.53	26.266			307	328	257	47
			17.606	24.059	51.748	31.151			399	443	58	28
			13.025	16.899	77.425	66.764			218	321	77	46
			37.653	14.084	33.74	162.275			209	478	138	55
			8.415	32.72	15.958	84.762			321	237	167	32
			25.275	18.469	76.395	24.52			259	410	94	109
			9.269	6.66	113.097	4.669			469	164	145	30
			18.214	7.974	63.321	9.082			377	311	58	16
			16.252	8.984	69.226	4.963			170	196	190	30
			4.247	0.696	45.421	8.327			360	111	191	47
			11.75		74.139	10.534
			9.357		30.611
			9.288
			6.179
			5.914

## Sheet: Figure S3- Source Data
	Fig S3B		Day 28		Day 56			Fig S3C		Day 28		Day 56			Fig S3D		Day 28		Day 56
	Amplitude	Fly #	LacZ	30R	LacZ	30R		ON transient	Fly #	LacZ	30R	LacZ	30R		OFF transient	Fly #	LacZ	30R	LacZ	30R
		1	13.3606	15.2863	11.1481	5.19714			1	1.09253	0.161743	0.924683	0.0427246			1	3.07312	1.55029	3.77808	0
		2	12.0728	12.027	12.5244	5.8197			2	0.393677	0.216675	1.0376	0.0366211			2	1.79138	0.915527	2.39563	0
		3	10.965	13.5834	9.34753	6.50635			3	0.582886	0.0976563	0.473022	0.134277			3	2.89001	1.15662	1.62659	0
		4	11.4075	14.4623	9.67407	7.08313			4	0.616455	0.112915	0.567627	0.0946045			4	1.82495	3.07922	1.80054	0
		5	14.2517	13.4552	9.96399	5.62134			5	0.827026	0.317383	0.424194	0.012207			5	3.09753	2.74048	2.17285	0
		6	9.48792	11.2885	9.54285	5.31006			6	0.292969	0.189209	1.37939	0.0213623			6	1.39771	2.81067	2.39258	0.0213623
		7	11.6486	13.3514		5.77698			7	0.549316	0.161743		0.0854492			7	2.02637	1.81274		0.0152588
		8	12.7258	12.1063					8	0.515747	0.738525					8	2.64587	3.09143
		9	12.5061	13.913					9	0.93689	0.387573					9	2.11792	2.45667
		10	12.3535	12.5732					10	1.09863	0.344849					10	2.7832	1.47095

[truncated: 4 more sheets: Figure S4- Source Data, Figure S6- Source Data, Figure S7- Source Data, Figure S8- Source Data]
